# Supplementary material
Source: PubMed Central journal article supplement (PMC4012475)
Supplement: 0b707d4276b481a9eb9978a3f31a6290_genetics.114.163170-3.pdf [file 0b707d4276b481a9eb9978a3f31a6290_genetics.114.163170-3.pdf]

**Table S3.** Testis salience ratios of genes differentially regulated in response to acute exposure. Data is shown for genes differentially expressed in each of 4 treatments (High sugar, DEHP, BPA, and the mixture). Background refers to the complete set of genes that passed the quality control steps and entered the analysis of differential expression. “Up” and “Down” identifies gene sets expressed in the testis at a level that is above or below the whole organism average, respectively.

| <b>TESTIS</b>                                          | Background | High sugar | DEHP | BPA  | Mixture |
|--------------------------------------------------------|------------|------------|------|------|---------|
| <b>Dataset of down-regulated genes (BPP &gt; 0.95)</b> |            |            |      |      |         |
| Up                                                     | 1985       | 29         | 23   | 66   | 36      |
| Down                                                   | 3554       | 53         | 41   | 85   | 98      |
| Ratio                                                  | 0.55       | 0.55       | 0.56 | 0.78 | 0.37    |
| <i>P-value = 0.06, Fisher's exact test</i>             |            |            |      |      |         |
| <b>Dataset of down-regulated genes (BPP &gt; 0.98)</b> |            |            |      |      |         |
| Up                                                     | 1985       | 8          | 8    | 22   | 5       |
| Down                                                   | 3554       | 16         | 14   | 35   | 53      |
| Ratio                                                  | 0.55       | 0.50       | 0.57 | 0.63 | 0.09    |
| <i>P-value = 0.0001, Fisher's exact test</i>           |            |            |      |      |         |
| <b>Dataset of up-regulated genes (BPP &gt; 0.95)</b>   |            |            |      |      |         |
| Up                                                     | 1985       | 20         | 19   | 25   | 12      |
| Down                                                   | 3554       | 106        | 72   | 167  | 146     |
| Ratio                                                  | 0.55       | 0.19       | 0.26 | 0.15 | 0.08    |
| <i>P-value = 2.20e-16, Fisher's exact test</i>         |            |            |      |      |         |
| <b>Dataset of up-regulated genes (BPP &gt; 0.98)</b>   |            |            |      |      |         |
| Up                                                     | 1985       | 5          | 6    | 9    | 5       |
| Down                                                   | 3554       | 31         | 26   | 67   | 55      |
| Ratio                                                  | 0.55       | 0.16       | 0.23 | 0.13 | 0.09    |
| <i>P-value = 1.21e-11 Fisher's exact test</i>          |            |            |      |      |         |
