# Supplementary material
Source: PubMed Central journal article supplement (PMC4012475)
Supplement: 0d0de33a6796d1113b4d6adb15c2c5fc_genetics.114.163170-11.pdf [file 0d0de33a6796d1113b4d6adb15c2c5fc_genetics.114.163170-11.pdf]

Figure S1

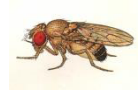

30 adult male flies were collected, and transferred to vials containing control food (which contains 150 mM of sucrose), food with BPA, high sugar (450 mM of sucrose), DEHP, or the mixture (BPA + DEHP + 450 mM of sucrose).

After 48 hours the flies were flash frozen in liquid nitrogen.

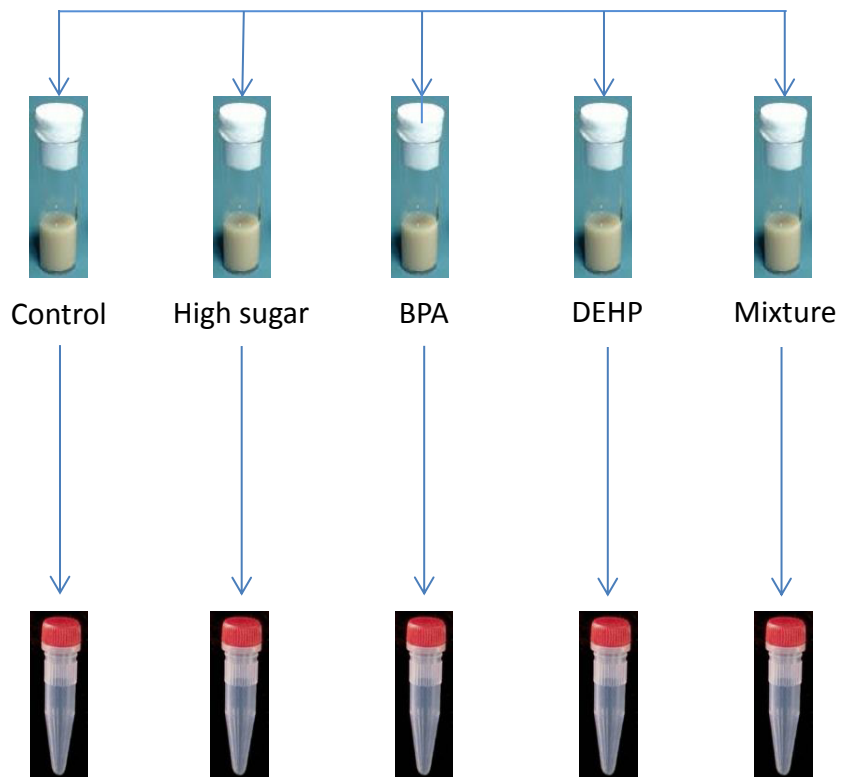

Figure S1. Cartoon with experimental design for acute exposure. We transferred adult male flies from the typical control laboratory diet to an identical diet in which BPA, DEHP, high sugar, or the mixture had been added. For the acute exposure flies were allowed to feed on the treatment diet for 48 hours. These flies were used to evaluate the effects of acute exposure on genome-wide gene expression. Four biological replicates were set up per treatment. Thirty males were exposed per biological replicate.

Figure S2

10 males and 15 female flies mated for 5 days in control food (which contains 150 mM of sucrose), food containing BPA, high sugar (450 mM of sucrose), or BPA and high sugar mixed together.

New male flies emerged from the food containing the compounds. They matured for 48hs in the same food they were raised.

After 48 hours the flies were flash frozen in liquid nitrogen.

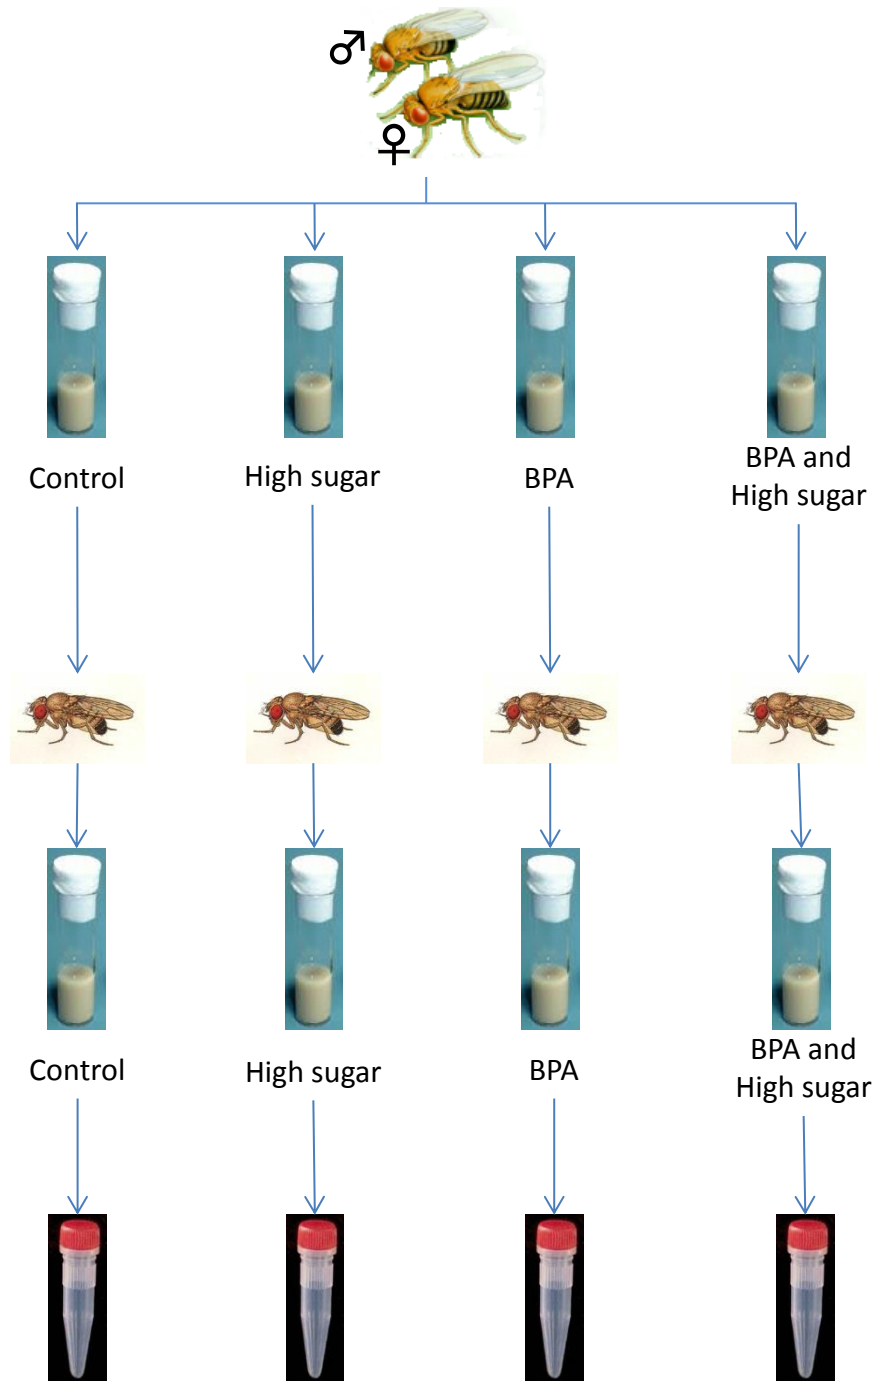

Figure S2. Cartoon with experimental design for chronic exposure. To study the chronic effect of BPA and high sugar, female flies laid eggs on the typical control laboratory diet or on an identical diet in which BPA, high sugar, or the mixture had been added. Flies were exposed to the treatment during development (from eggs to adults) and maintained in the treatment diet for 48hs upon emergence. These flies were used to evaluate genome-wide gene expression responses under chronic exposure. Four biological replicates were set up per treatment. Each treatment was further replicated in two genotypes.

Figure S3

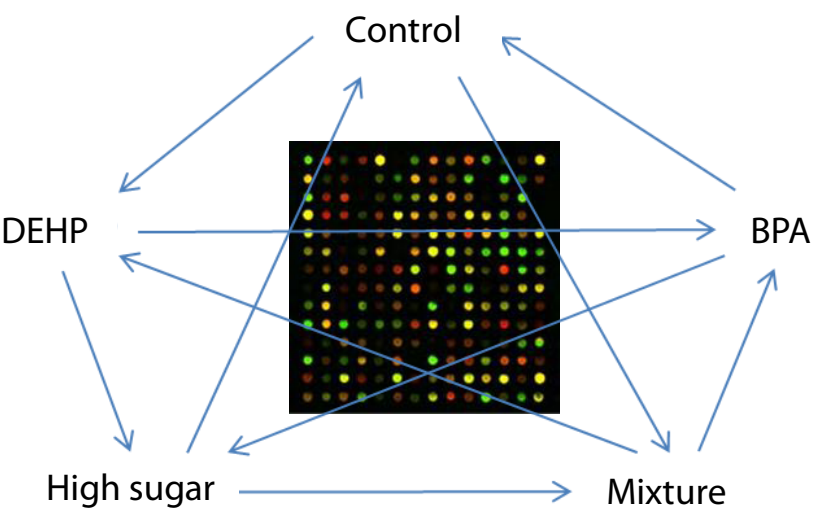

Figure S3. Microarray design for acute exposure. Dual-channel microarrays were used to study genome-wide gene expression. Two biological replicates were collected per treatment, with balanced dye swaps. Arrows represent the contrasts between 2 samples (1 microarray slide), and point from samples labeled with Cy5 to samples labeled with Cy3. In total, the expression signal of each treatment was collected from 4 distinct microarray slides.

Figure S4

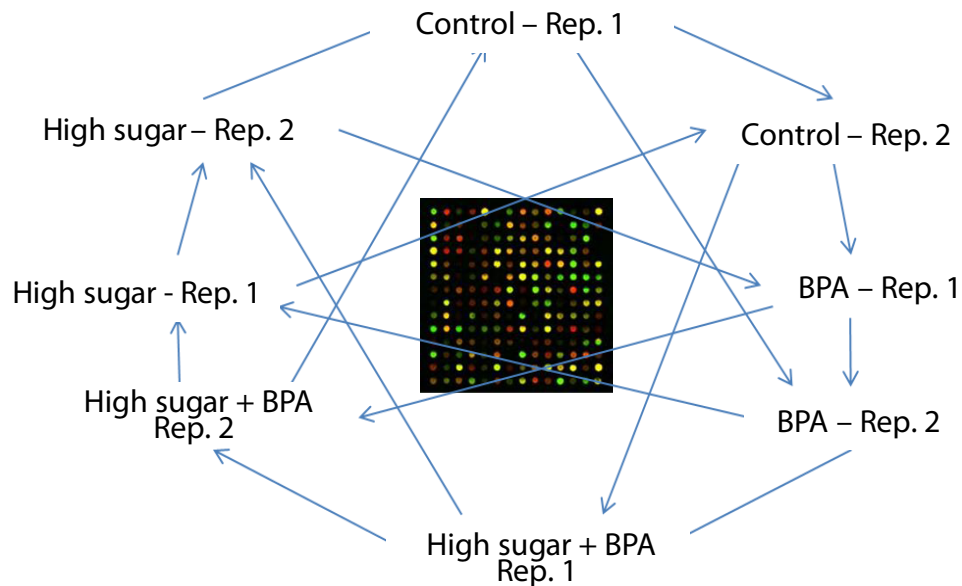

Figure S4. Microarray design for chronic exposure. Dual-channel microarrays were used for the genome-wide gene expression analysis. Each treatment was evaluated with two genotypes (rep 1 and rep 2). Each genotype replicate was evaluated twice (2 biological replicates per genotype and diet combination) with dye swaps. Arrows represent the contrasts between 2 samples (1 microarray slide), and point from samples labeled with Cy5 to samples labeled with Cy3. In total, the expression signal of each treatment was collected from 8 distinct microarray slides.

Figure S5

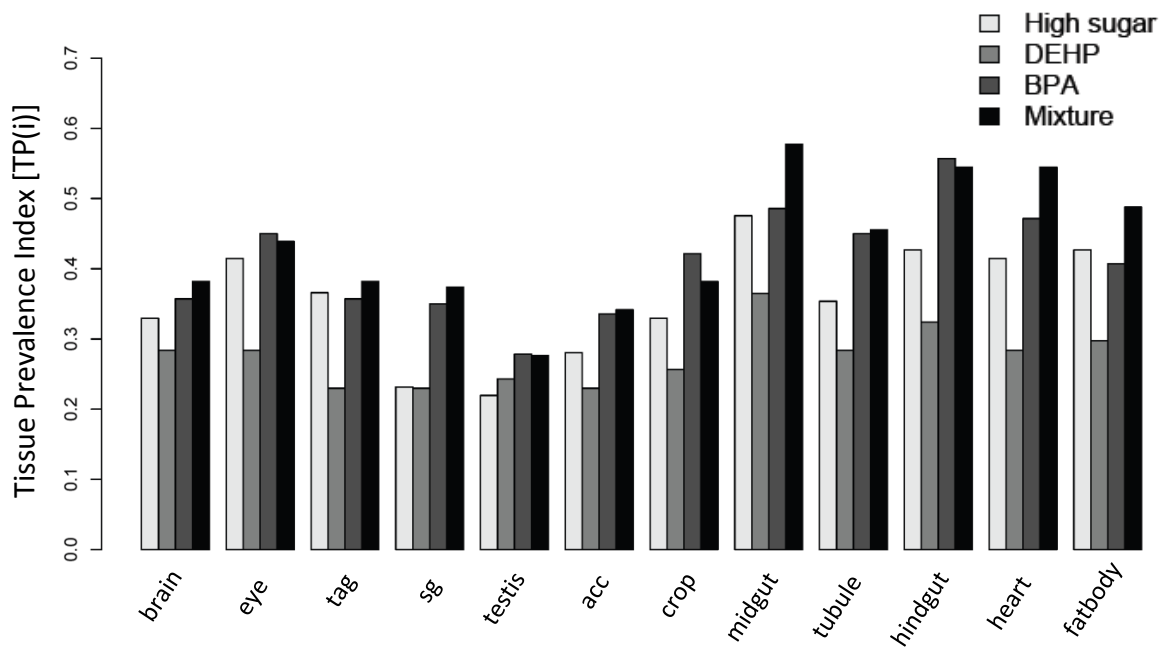

Figure S5. Tissue prevalence of genes up-regulated upon acute treatment with BPA, DEHP, and high sugar. Tissue prevalence indexes were calculated with the set of genes up-regulated in each treatment (BPP > 0.97). Tissue expression data are from the FlyAtlas database.

Figure S6

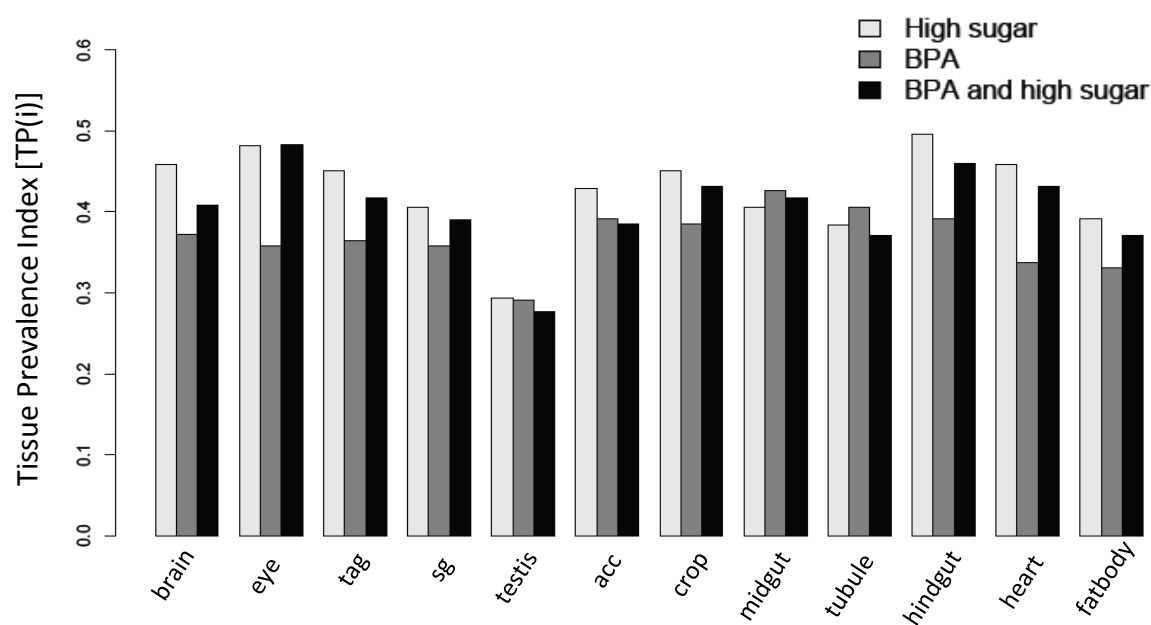

Figure S6. Tissue prevalence of genes up-regulated upon chronic exposure to BPA and high sugar. Tissue prevalence indexes were calculated with the set of genes up-regulated in each treatment (BPP > 0.97). Tissue expression data are from the FlyAtlas database.

Figure S7

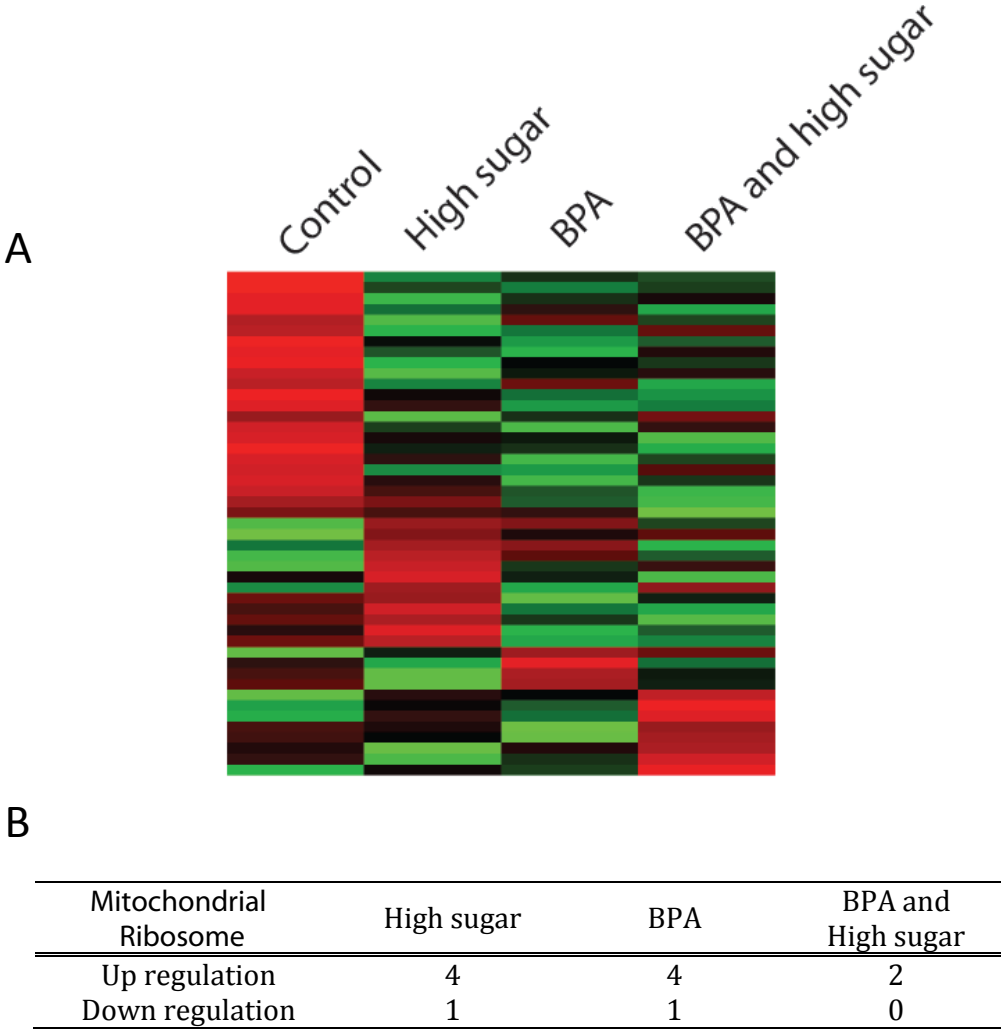

Figure S7. Expression profile of mitochondrial ribosome genes upon chronic exposure to BPA and high sugar. (A) Heat map shows the expression profile of 47 mitochondrial ribosome genes after chronic exposure to high sugar, BPA, and the mixture (BPA and high sugar). The scale color was normalized for each gene with green and red denoting high and low transcript abundance, respectively. (B) Number of mitochondrial ribosome genes significantly up-regulated ( $BPP > 0.95$ ) in response to each treatment.

**Table S1.** Midgut salience ratios of genes differentially regulated in response to acute exposure. Data is shown for genes differentially expressed in each of 4 treatments (High sugar, DEHP, BPA, and the mixture). Background refers to the complete set of genes that passed the quality control steps and entered the analysis of differential expression. “Up” and “Down” identifies gene sets expressed in the midgut and at a level that is above or below the whole organism average, respectively.

| Midgut                                              | Background | High sugar | DEHP | BPA  | Mixture |
|-----------------------------------------------------|------------|------------|------|------|---------|
| Dataset of <b>down-regulated</b> genes (BPP > 0.95) |            |            |      |      |         |
| Up                                                  | 1594       | 30         | 22   | 64   | 86      |
| Down                                                | 3545       | 46         | 33   | 90   | 61      |
| Ratio                                               | 0.45       | 0.65       | 0.66 | 0.71 | 1.41    |
| <i>P-value = 1.006e-11, Fisher's exact test</i>     |            |            |      |      |         |
| Dataset of <b>down-regulated</b> genes (BPP > 0.98) |            |            |      |      |         |
| Up                                                  | 1594       | 11         | 8    | 39   | 56      |
| Down                                                | 3545       | 12         | 10   | 23   | 9       |
| Ratio                                               | 0.45       | 0.91       | 0.80 | 1.70 | 6.22    |
| <i>P-value &lt; 2.2e-16, Fisher's exact test</i>    |            |            |      |      |         |
| Dataset of <b>up-regulated</b> genes (BPP > 0.95)   |            |            |      |      |         |
| Up                                                  | 1594       | 45         | 47   | 93   | 84      |
| Down                                                | 3545       | 77         | 44   | 95   | 72      |
| Ratio                                               | 0.45       | 0.58       | 1.07 | 0.98 | 1.17    |
| <i>P-value &lt; 0.001, Fisher's exact test</i>      |            |            |      |      |         |
| Dataset of <b>up-regulated</b> genes (BPP > 0.98)   |            |            |      |      |         |
| Up                                                  | 1594       | 13         | 14   | 32   | 28      |
| Down                                                | 3545       | 22         | 20   | 40   | 30      |
| Ratio                                               | 0.45       | 0.59       | 0.70 | 0.80 | 0.93    |
| <i>P-value &lt; 0.002, Fisher's exact test</i>      |            |            |      |      |         |

**Table S2.** Testis salience ratios of genes down-regulated in response to chronic exposure. (A) Dataset of down-regulated genes with BPP > 0.95. (B) Dataset of down-regulated genes with BPP > 0.97. Data is shown for genes differentially expressed in each of 3 treatments (BPA, high sugar, and the mixture). Background refers to the complete set of genes that passed the quality control steps and entered the analysis of differential expression. “Up” and “Down” identifies gene sets expressed in the testis and at a level that is above or below the whole organism average, respectively.

A

| TESTIS | Background | BPA  | High sugar | Mixture |
|--------|------------|------|------------|---------|
| Up     | 1733       | 82   | 60         | 125     |
| Down   | 2722       | 66   | 73         | 70      |
| Ratio  | 0.64       | 1.24 | 0.82       | 1.79    |

*P-value = 1.05e-13, Fisher’s exact test*

B

| TESTIS | Background | BPA  | High sugar | Mixture |
|--------|------------|------|------------|---------|
| Up     | 1733       | 41   | 30         | 72      |
| Down   | 2722       | 26   | 38         | 35      |
| Ratio  | 0.64       | 1.58 | 0.79       | 2.06    |

*P-value = 2.55e-10, Fisher’s exact test*

**Table S3.** Testis salience ratios of genes differentially regulated in response to acute exposure. Data is shown for genes differentially expressed in each of 4 treatments (High sugar, DEHP, BPA, and the mixture). Background refers to the complete set of genes that passed the quality control steps and entered the analysis of differential expression. “Up” and “Down” identifies gene sets expressed in the testis at a level that is above or below the whole organism average, respectively.

| <b>TESTIS</b>                                          | Background | High sugar | DEHP | BPA  | Mixture |
|--------------------------------------------------------|------------|------------|------|------|---------|
| <b>Dataset of down-regulated genes (BPP &gt; 0.95)</b> |            |            |      |      |         |
| Up                                                     | 1985       | 29         | 23   | 66   | 36      |
| Down                                                   | 3554       | 53         | 41   | 85   | 98      |
| Ratio                                                  | 0.55       | 0.55       | 0.56 | 0.78 | 0.37    |
| <i>P-value = 0.06, Fisher's exact test</i>             |            |            |      |      |         |
| <b>Dataset of down-regulated genes (BPP &gt; 0.98)</b> |            |            |      |      |         |
| Up                                                     | 1985       | 8          | 8    | 22   | 5       |
| Down                                                   | 3554       | 16         | 14   | 35   | 53      |
| Ratio                                                  | 0.55       | 0.50       | 0.57 | 0.63 | 0.09    |
| <i>P-value = 0.0001, Fisher's exact test</i>           |            |            |      |      |         |
| <b>Dataset of up-regulated genes (BPP &gt; 0.95)</b>   |            |            |      |      |         |
| Up                                                     | 1985       | 20         | 19   | 25   | 12      |
| Down                                                   | 3554       | 106        | 72   | 167  | 146     |
| Ratio                                                  | 0.55       | 0.19       | 0.26 | 0.15 | 0.08    |
| <i>P-value = 2.20e-16, Fisher's exact test</i>         |            |            |      |      |         |
| <b>Dataset of up-regulated genes (BPP &gt; 0.98)</b>   |            |            |      |      |         |
| Up                                                     | 1985       | 5          | 6    | 9    | 5       |
| Down                                                   | 3554       | 31         | 26   | 67   | 55      |
| Ratio                                                  | 0.55       | 0.16       | 0.23 | 0.13 | 0.09    |
| <i>P-value = 1.21e-11 Fisher's exact test</i>          |            |            |      |      |         |

**Table S4.** Tissue salience ratio of genes up-regulated in response to chronic exposures. (A) Dataset of up-regulated genes with BPP > 0.95. (B) Dataset of up-regulated genes with BPP > 0.99. CNS stands for central nervous system. Data is shown for genes differentially expressed in each of 3 treatments (BPA, high sugar, and the mixture). Background refers to the complete set of genes that passed the quality control steps and entered the analysis of differential expression. “Up” and “Down” identifies gene sets expressed in the tissue at a level that is above or below the whole organism average, respectively.

**A**

| <b>MIDGUT</b>                                    | Background | BPA  | High sugar | Mixture |
|--------------------------------------------------|------------|------|------------|---------|
| Up                                               | 1158       | 68   | 65         | 102     |
| Down                                             | 2971       | 87   | 123        | 138     |
| Ratio                                            | 0.39       | 0.78 | 0.52       | 0.74    |
| <i>P-value = 1.342e-08, Fisher’s exact test</i>  |            |      |            |         |
| <b>HINDGUT</b>                                   | Background | BPA  | High sugar | Mixture |
| Up                                               | 1415       | 73   | 96         | 133     |
| Down                                             | 2633       | 76   | 91         | 104     |
| Ratio                                            | 0.54       | 0.96 | 1.05       | 1.28    |
| <i>P-value = 1.151e-14, Fisher’s exact test</i>  |            |      |            |         |
| <b>CNS</b>                                       | Background | BPA  | High sugar | Mixture |
| Up                                               | 1704       | 62   | 75         | 88      |
| Down                                             | 2481       | 101  | 115        | 148     |
| Ratio                                            | 0.69       | 0.61 | 0.65       | 0.60    |
| <i>P-value = 0.6754, Fisher’s exact test</i>     |            |      |            |         |
| <b>TESTIS</b>                                    | Background | BPA  | High sugar | Mixture |
| Up                                               | 1733       | 42   | 37         | 39      |
| Down                                             | 2722       | 136  | 168        | 221     |
| Ratio                                            | 0.64       | 0.31 | 0.22       | 0.18    |
| <i>P-value &lt; 2.2e-16, Fisher’s exact test</i> |            |      |            |         |

**B**

| <b>MIDGUT</b>                                   | Background | BPA  | High sugar | Mixture |
|-------------------------------------------------|------------|------|------------|---------|
| Up                                              | 1158       | 13   | 10         | 24      |
| Down                                            | 2971       | 13   | 26         | 36      |
| Ratio                                           | 0.39       | 1.0  | 0.38       | 0.67    |
| <i>P-value = 0.020, Fisher’s exact test</i>     |            |      |            |         |
| <b>HINDGUT</b>                                  | Background | BPA  | High sugar | Mixture |
| Up                                              | 1415       | 20   | 18         | 33      |
| Down                                            | 2633       | 7    | 20         | 27      |
| Ratio                                           | 0.54       | 2.9  | 0.90       | 1.22    |
| <i>P-value = 1.80e-06, Fisher’s exact test</i>  |            |      |            |         |
| <b>CNS</b>                                      | Background | BPA  | High sugar | Mixture |
| Up                                              | 1704       | 10   | 13         | 23      |
| Down                                            | 2481       | 19   | 29         | 43      |
| Ratio                                           | 0.69       | 0.53 | 0.45       | 0.53    |
| <i>P-value = 0.415, Fisher’s exact test</i>     |            |      |            |         |
| <b>TESTIS</b>                                   | Background | BPA  | High sugar | Mixture |
| Up                                              | 1733       | 5    | 6          | 3       |
| Down                                            | 2722       | 28   | 38         | 61      |
| Ratio                                           | 0.64       | 0.19 | 0.16       | 0.05    |
| <i>P-value = 3.459e-13, Fisher’s exact test</i> |            |      |            |         |
