# Supplementary material
Source: PubMed Central journal article supplement (PMC4012475)
Supplement: 2db44dc5416bd9cdb12214c876945d74_genetics.114.163170-10.pdf [file 2db44dc5416bd9cdb12214c876945d74_genetics.114.163170-10.pdf]

Figure S7

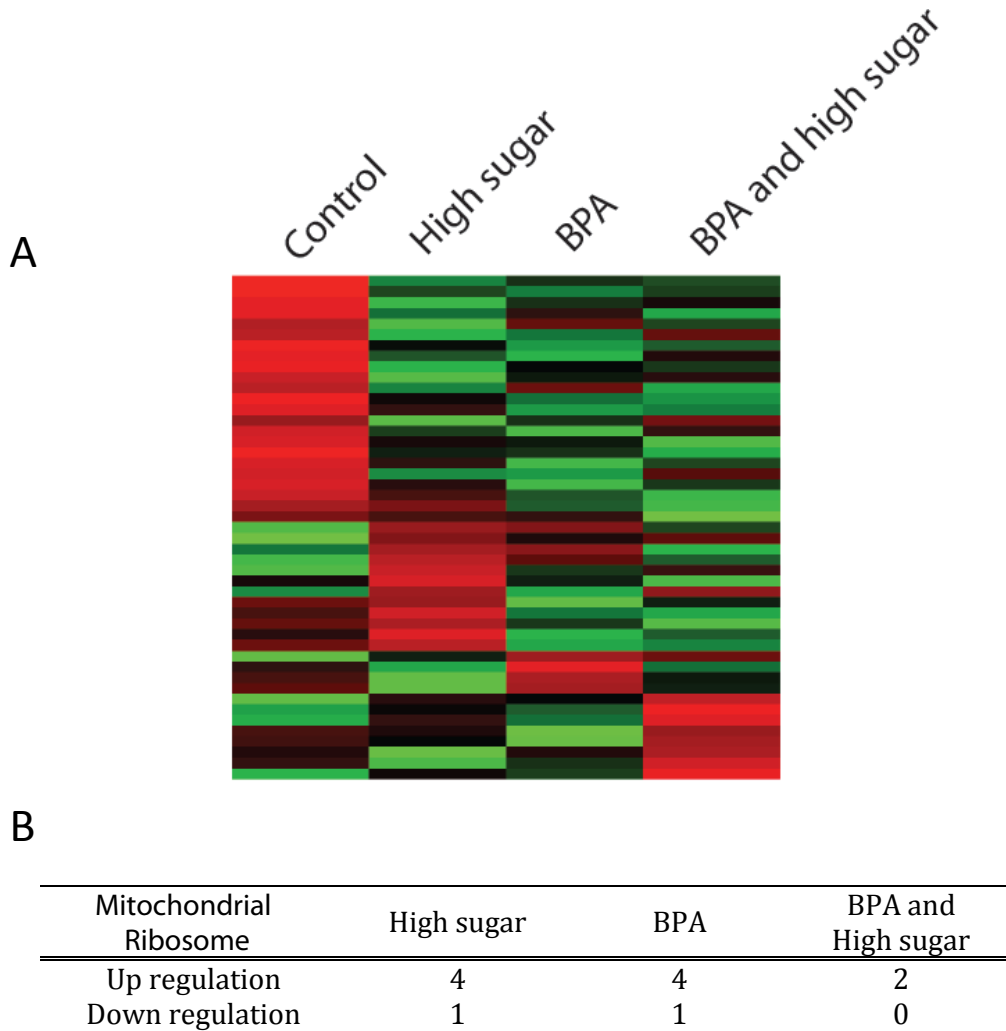

Figure S7. Expression profile of mitochondrial ribosome genes upon chronic exposure to BPA and high sugar. (A) Heat map shows the expression profile of 47 mitochondrial ribosome genes after chronic exposure to high sugar, BPA, and the mixture (BPA and high sugar). The scale color was normalized for each gene with green and red denoting high and low transcript abundance, respectively. (B) Number of mitochondrial ribosome genes significantly up-regulated (BPP > 0.95) in response to each treatment.
