# Supplementary material
Source: PubMed Central journal article supplement (PMC4012475)
Supplement: 4def784915563d553237cee3abed6eb4_genetics.114.163170-7.pdf [file 4def784915563d553237cee3abed6eb4_genetics.114.163170-7.pdf]

**Table S4.** Tissue salience ratio of genes up-regulated in response to chronic exposures. (A) Dataset of up-regulated genes with BPP > 0.95. (B) Dataset of up-regulated genes with BPP > 0.99. CNS stands for central nervous system. Data is shown for genes differentially expressed in each of 3 treatments (BPA, high sugar, and the mixture). Background refers to the complete set of genes that passed the quality control steps and entered the analysis of differential expression. “Up” and “Down” identifies gene sets expressed in the tissue at a level that is above or below the whole organism average, respectively.

**A**

| <b>MIDGUT</b> | Background | BPA  | High sugar | Mixture |
|---------------|------------|------|------------|---------|
| Up            | 1158       | 68   | 65         | 102     |
| Down          | 2971       | 87   | 123        | 138     |
| Ratio         | 0.39       | 0.78 | 0.52       | 0.74    |

*P-value = 1.342e-08, Fisher’s exact test*

| <b>HINDGUT</b> | Background | BPA  | High sugar | Mixture |
|----------------|------------|------|------------|---------|
| Up             | 1415       | 73   | 96         | 133     |
| Down           | 2633       | 76   | 91         | 104     |
| Ratio          | 0.54       | 0.96 | 1.05       | 1.28    |

*P-value = 1.151e-14, Fisher’s exact test*

| <b>CNS</b> | Background | BPA  | High sugar | Mixture |
|------------|------------|------|------------|---------|
| Up         | 1704       | 62   | 75         | 88      |
| Down       | 2481       | 101  | 115        | 148     |
| Ratio      | 0.69       | 0.61 | 0.65       | 0.60    |

*P-value = 0.6754, Fisher’s exact test*

| <b>TESTIS</b> | Background | BPA  | High sugar | Mixture |
|---------------|------------|------|------------|---------|
| Up            | 1733       | 42   | 37         | 39      |
| Down          | 2722       | 136  | 168        | 221     |
| Ratio         | 0.64       | 0.31 | 0.22       | 0.18    |

*P-value < 2.2e-16, Fisher’s exact test*

**B**

| <b>MIDGUT</b> | Background | BPA | High sugar | Mixture |
|---------------|------------|-----|------------|---------|
| Up            | 1158       | 13  | 10         | 24      |
| Down          | 2971       | 13  | 26         | 36      |
| Ratio         | 0.39       | 1.0 | 0.38       | 0.67    |

*P-value = 0.020, Fisher’s exact test*

| <b>HINDGUT</b> | Background | BPA | High sugar | Mixture |
|----------------|------------|-----|------------|---------|
| Up             | 1415       | 20  | 18         | 33      |
| Down           | 2633       | 7   | 20         | 27      |
| Ratio          | 0.54       | 2.9 | 0.90       | 1.22    |

*P-value = 1.80e-06, Fisher’s exact test*

| <b>CNS</b> | Background | BPA  | High sugar | Mixture |
|------------|------------|------|------------|---------|
| Up         | 1704       | 10   | 13         | 23      |
| Down       | 2481       | 19   | 29         | 43      |
| Ratio      | 0.69       | 0.53 | 0.45       | 0.53    |

*P-value = 0.415, Fisher’s exact test*

| <b>TESTIS</b> | Background | BPA  | High sugar | Mixture |
|---------------|------------|------|------------|---------|
| Up            | 1733       | 5    | 6          | 3       |
| Down          | 2722       | 28   | 38         | 61      |
| Ratio         | 0.64       | 0.19 | 0.16       | 0.05    |

*P-value = 3.459e-13, Fisher’s exact test*
