# Supplementary material
Source: PubMed Central journal article supplement (PMC4012475)
Supplement: 342fae07b28731a320b0bca55f4acf49_genetics.114.163170-6.pdf [file 342fae07b28731a320b0bca55f4acf49_genetics.114.163170-6.pdf]

Figure S4

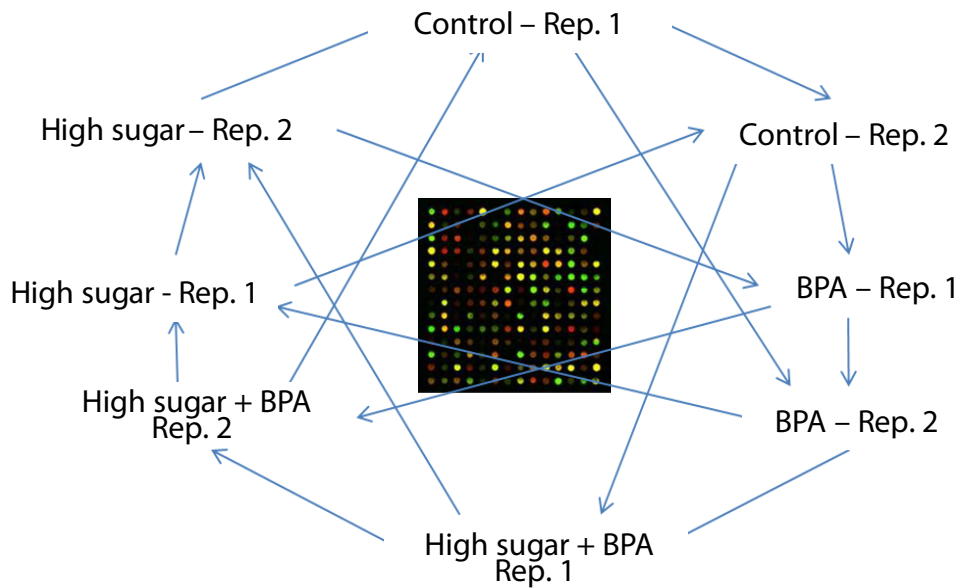

Figure S4. Microarray design for chronic exposure. Dual-channel microarrays were used for the genome-wide gene expression analysis. Each treatment was evaluated with two genotypes (rep 1 and rep 2). Each genotype replicate was evaluated twice (2 biological replicates per genotype and diet combination) with dye swaps. Arrows represent the contrasts between 2 samples (1 microarray slide), and point from samples labeled with Cy5 to samples labeled with Cy3. In total, the expression signal of each treatment was collected from 8 distinct microarray slides.
