# Supplementary material
Source: PubMed Central journal article supplement (PMC4012475)
Supplement: 745c5000f2c8a650d7e7cd9ca5b910b1_genetics.114.163170-9.pdf [file 745c5000f2c8a650d7e7cd9ca5b910b1_genetics.114.163170-9.pdf]

**Table S2.** Testis salience ratios of genes down-regulated in response to chronic exposure. (A) Dataset of down-regulated genes with BPP > 0.95. (B) Dataset of down-regulated genes with BPP > 0.97. Data is shown for genes differentially expressed in each of 3 treatments (BPA, high sugar, and the mixture). Background refers to the complete set of genes that passed the quality control steps and entered the analysis of differential expression. “Up” and “Down” identifies gene sets expressed in the testis and at a level that is above or below the whole organism average, respectively.

A

| TESTIS | Background | BPA  | High sugar | Mixture |
|--------|------------|------|------------|---------|
| Up     | 1733       | 82   | 60         | 125     |
| Down   | 2722       | 66   | 73         | 70      |
| Ratio  | 0.64       | 1.24 | 0.82       | 1.79    |

*P-value = 1.05e-13, Fisher’s exact test*

B

| TESTIS | Background | BPA  | High sugar | Mixture |
|--------|------------|------|------------|---------|
| Up     | 1733       | 41   | 30         | 72      |
| Down   | 2722       | 26   | 38         | 35      |
| Ratio  | 0.64       | 1.58 | 0.79       | 2.06    |

*P-value = 2.55e-10, Fisher’s exact test*
