# Supplementary material
Source: PubMed Central journal article supplement (PMC4012475)
Supplement: 69904949e2e7944ddceebfe673499b33_genetics.114.163170-12.pdf [file 69904949e2e7944ddceebfe673499b33_genetics.114.163170-12.pdf]

Figure S5

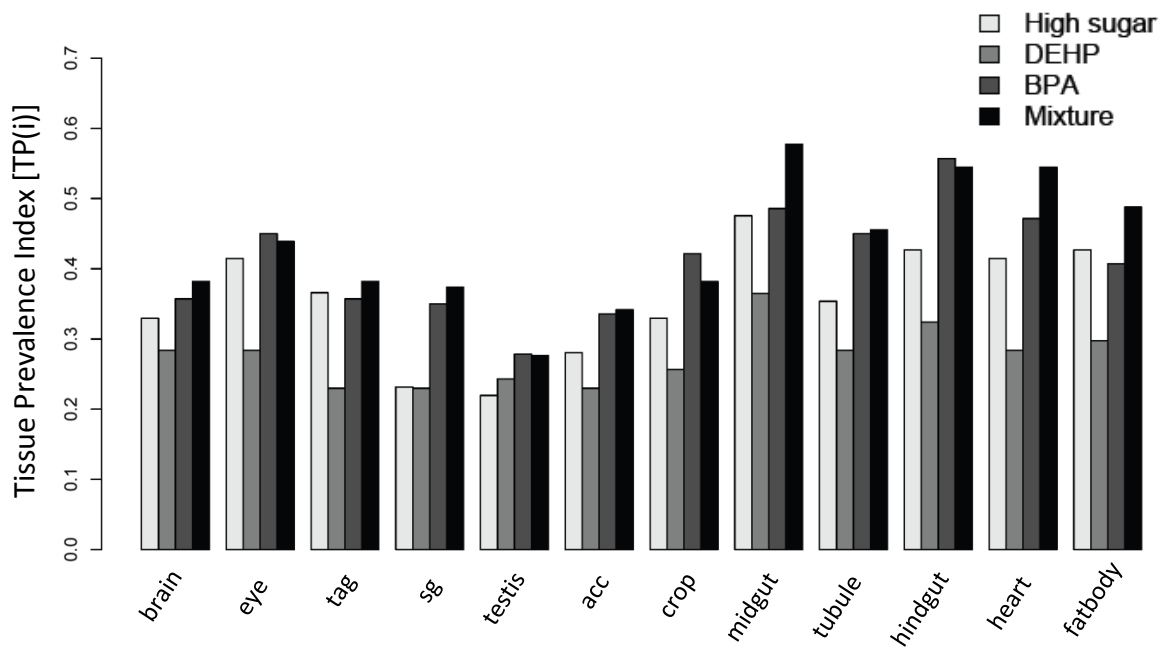

Figure S5. Tissue prevalence of genes up-regulated upon acute treatment with BPA, DEHP, and high sugar. Tissue prevalence indexes were calculated with the set of genes up-regulated in each treatment (BPP > 0.97). Tissue expression data are from the FlyAtlas database.
