# Supplementary material
Source: PubMed Central journal article supplement (PMC4012475)
Supplement: 184932885bb0d1d3430d01ba336520c3_genetics.114.163170-1.pdf [file 184932885bb0d1d3430d01ba336520c3_genetics.114.163170-1.pdf]

Figure S3

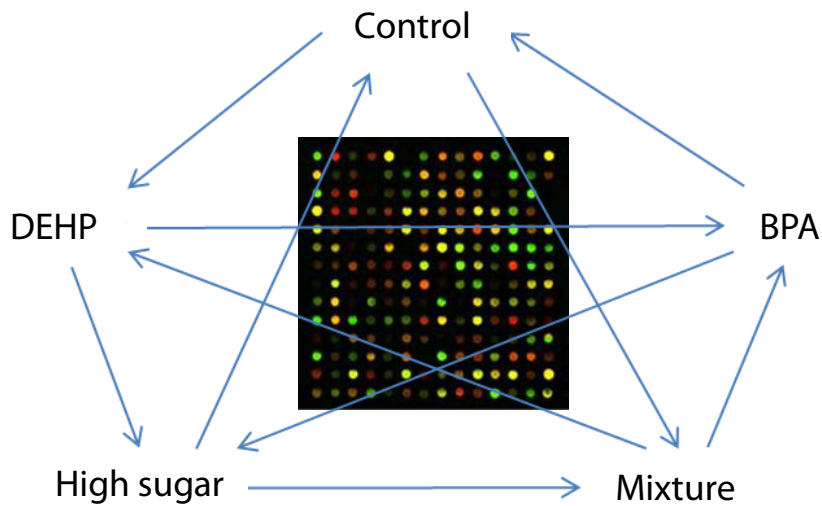

Figure S3. Microarray design for acute exposure. Dual-channel microarrays were used to study genome-wide gene expression. Two biological replicates were collected per treatment, with balanced dye swaps. Arrows represent the contrasts between 2 samples (1 microarray slide), and point from samples labeled with Cy5 to samples labeled with Cy3. In total, the expression signal of each treatment was collected from 4 distinct microarray slides.
