# Supplementary material
Source: PubMed Central journal article supplement (PMC4012475)
Supplement: b79e871457b3d7e72764e69a1e843fdb_genetics.114.163170-5.pdf [file b79e871457b3d7e72764e69a1e843fdb_genetics.114.163170-5.pdf]

Figure S6

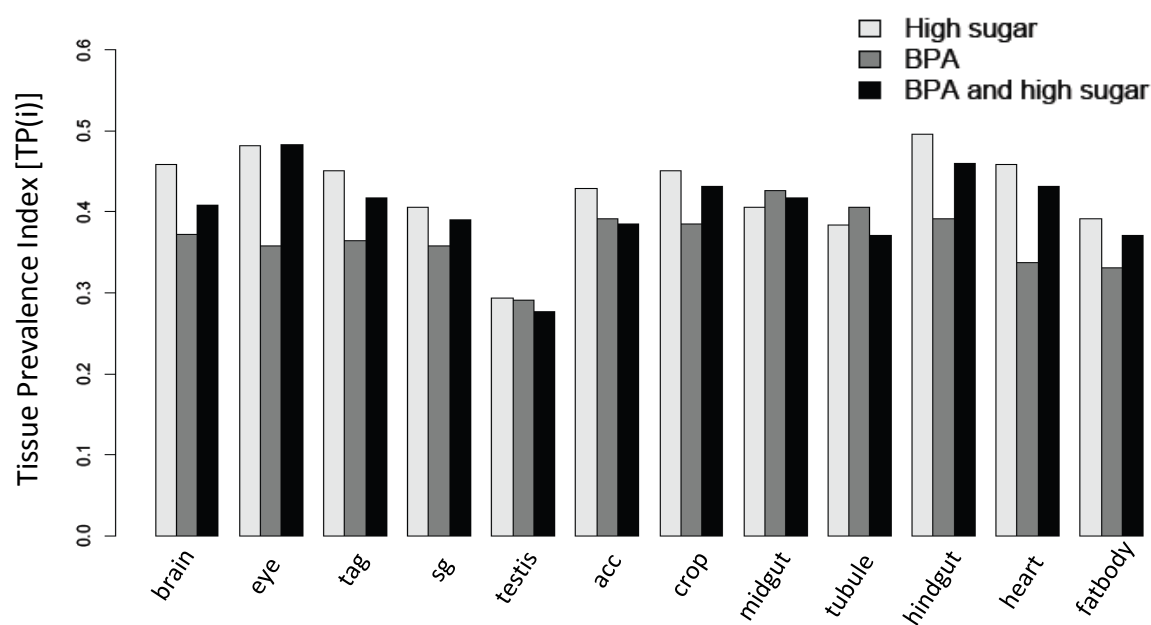

Figure S6. Tissue prevalence of genes up-regulated upon chronic exposure to BPA and high sugar. Tissue prevalence indexes were calculated with the set of genes up-regulated in each treatment (BPP > 0.97). Tissue expression data are from the FlyAtlas database.
