# Supplementary material
Source: PubMed Central journal article supplement (PMC4012475)
Supplement: c74e107c52504480d50a92bbe13cb1e1_genetics.114.163170-8.pdf [file c74e107c52504480d50a92bbe13cb1e1_genetics.114.163170-8.pdf]

Figure S2

10 males and 15 female flies mated for 5 days in control food (which contains 150 mM of sucrose), food containing BPA, high sugar (450 mM of sucrose), or BPA and high sugar mixed together.

New male flies emerged from the food containing the compounds. They matured for 48hs in the same food they were raised.

After 48 hours the flies were flash frozen in liquid nitrogen.

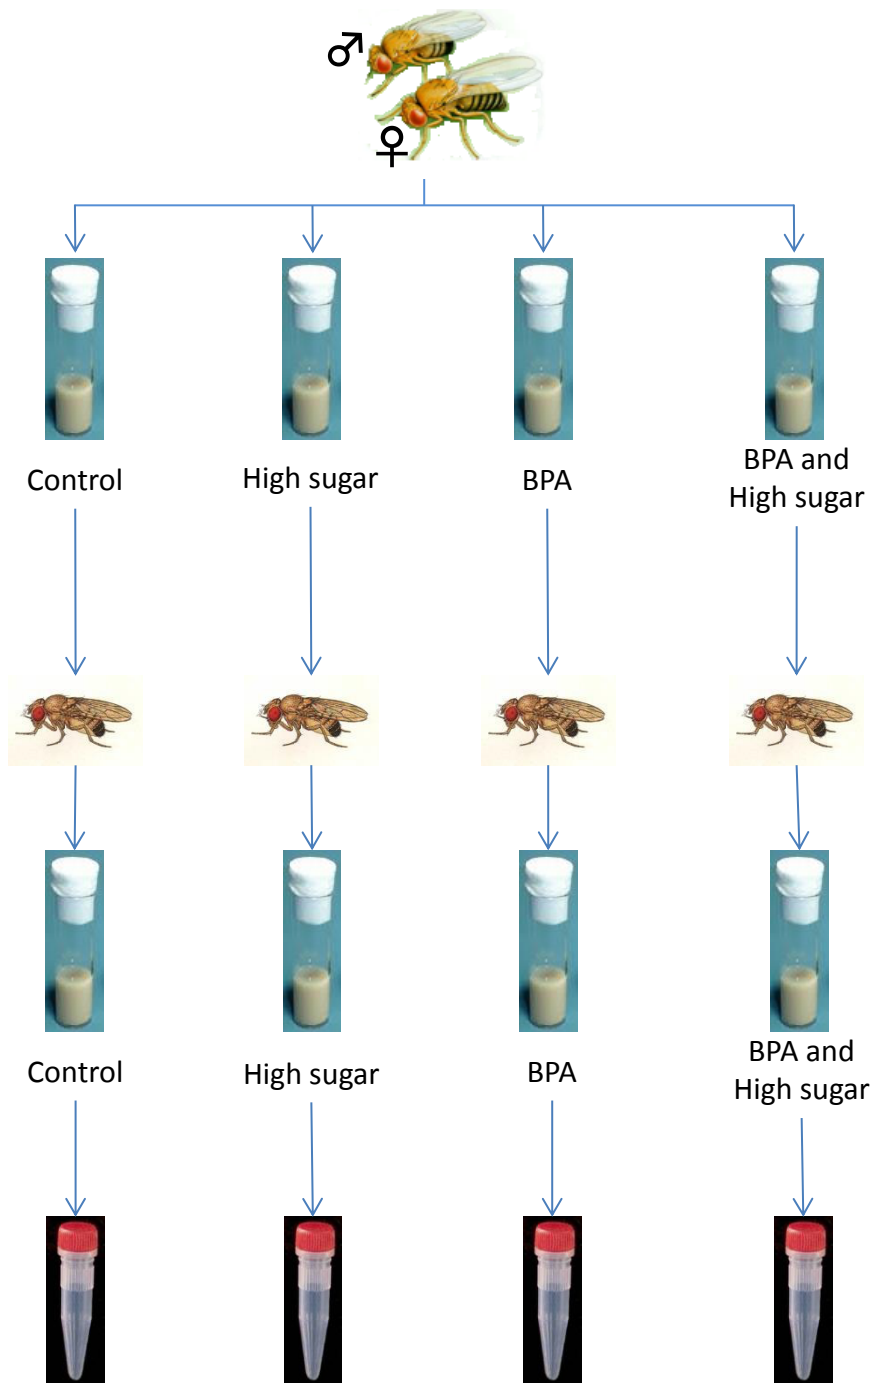

Figure S2. Cartoon with experimental design for chronic exposure. To study the chronic effect of BPA and high sugar, female flies laid eggs on the typical control laboratory diet or on an identical diet in which BPA, high sugar, or the mixture had been added. Flies were exposed to the treatment during development (from eggs to adults) and maintained in the treatment diet for 48hs upon emergence. These flies were used to evaluate genome-wide gene expression responses under chronic exposure. Four biological replicates were set up per treatment. Each treatment was further replicated in two genotypes.
