# Supplementary material
Source: PubMed Central journal article supplement (PMC4012475)
Supplement: f5b065afe5a23ff61a65fe67e6bc9361_genetics.114.163170-4.pdf [file f5b065afe5a23ff61a65fe67e6bc9361_genetics.114.163170-4.pdf]

# Figure S1

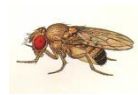

30 adult male flies were collected, and transferred to vials containing control food (which contains 150 mM of sucrose), food with BPA, high sugar (450 mM of sucrose), DEHP, or the mixture (BPA + DEHP + 450 mM of sucrose).

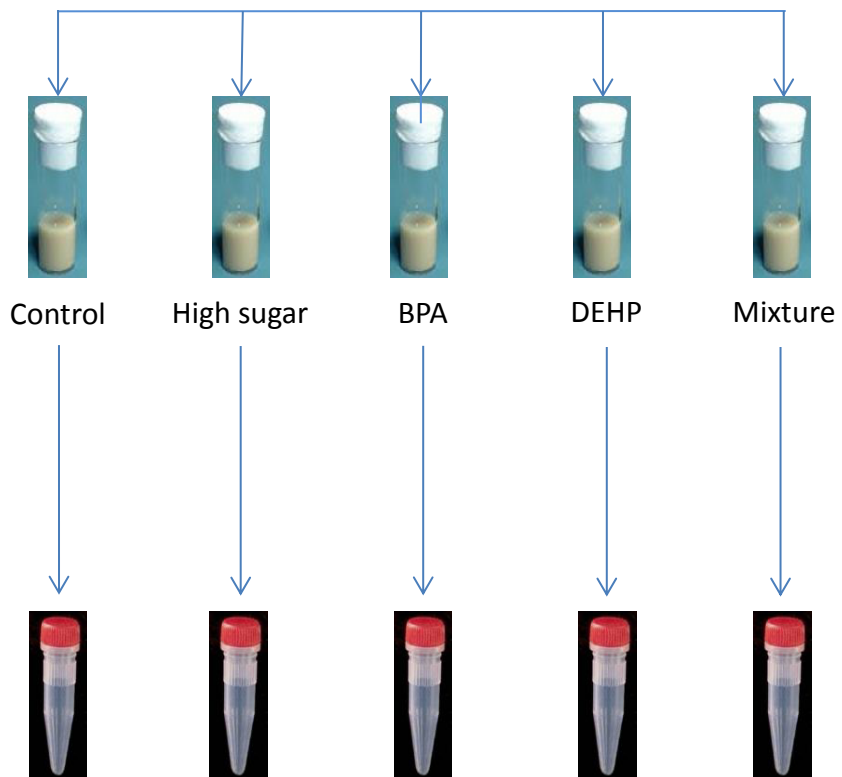

After 48 hours the flies were flash frozen in liquid nitrogen.

Figure S1. Cartoon with experimental design for acute exposure. We transferred adult male flies from the typical control laboratory diet to an identical diet in which BPA, DEHP, high sugar, or the mixture had been added. For the acute exposure flies were allowed to feed on the treatment diet for 48 hours. These flies were used to evaluate the effects of acute exposure on genome-wide gene expression. Four biological replicates were set up per treatment. Thirty males were exposed per biological replicate.
